# Supplementary material
Source: PubMed Central journal article supplement (PMC2945531)
Supplement: supp_M110.135251_jbc.M110.135251-1.pdf [file supp_M110.135251_jbc.M110.135251-1.pdf]

Supplementary Figure S1

| Plasmid generated               | Residues mutated    | Oligos used for mutagenesis<br>(Forward and Reverse primers)                   |
|---------------------------------|---------------------|--------------------------------------------------------------------------------|
| pRSETA-PE_PGRS11 <sub>RHG</sub> | R289A, H290A, G291A | Forward 5'CATCGACTTCGTGGCGGCCGCCAGACG 3'<br>Reverse 5'GCAAGTTCGCCAACGGCGCGG 3' |
| pRSETA-PE_PGRS11 <sub>RH</sub>  | R289A, H290A        | Forward 5'CGTGGCGGCCGCCAGACGCCGGG 3'<br>Reverse 5'GCAAGTTCGCCAACGGCGCGG 3'     |
| pRSETA-PE_PGRS11 <sub>R</sub>   | R289A               | Forward 5'CTTCGTGGCGCACGGCCAGACGCC 3'<br>Reverse 5'GCAAGTTCGCCAACGGCGCGG 3'    |
| pRSETA-PE_PGRS11 <sub>H</sub>   | H290A               | Forward 5'CGTGGCGGCCGCCAGACGCCGGG 3'<br>Reverse 5'GCAAGTTCGCCAACGGCGCGG 3'     |
| pRSETA-PE_PGRS11 <sub>S</sub>   | S348A               | Forward 5'TCGACGCGCAGTTGATCAGAACG 3'<br>Reverse 5'GTCCAGGCGATCGGGCCG 3'        |

Supplementary Figure S1. The primer pairs used to mutate specific active site residues in Phosphoglycerate mutase domain of PE\_PGRS11.

Supplementary Figure S2

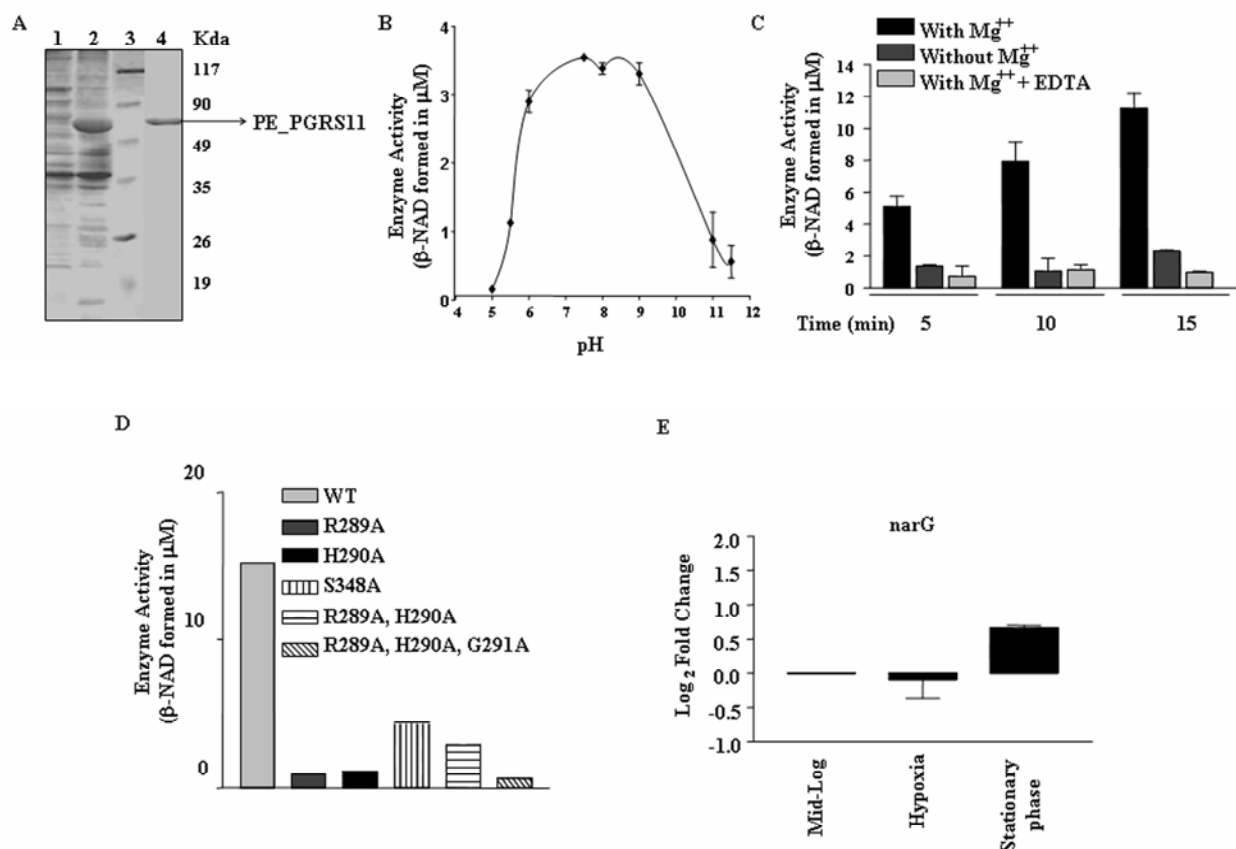

**Supplementary Figure S2.** Analysis of kinetic parameter associated with Phosphoglycerate mutase enzyme activity of PE\_PGRS11. **A.** The SDS-PAGE gel representing the expression and purification of PE\_PGRS11. Lane 1, uninduced *E. coli*; lane 2, induced *E. coli*; lane 3, protein marker; lane 4, eluted PE\_PGRS11 protein. **B.** The graph representing pH optimum for Phosphoglycerate mutase enzyme activity of PE\_PGRS11. Enzyme activity was measured in pH range of 6–11 in different buffers (pH 6.0–7.0, imidazole buffer; pH 8.0–9.0, Tris–HCl buffer; pH 10.0–11.0, Sodium acetate buffer) using 1 μg purified PE\_PGRS11 protein in the reaction mix at 25° C. **C.** Effect of Mg<sup>++</sup> on Phosphoglycerate mutase enzyme activity. Enzymatic reactions were carried out in presence or absence of Mg<sup>++</sup> (essential co-ion required for Phosphoglycerate mutase activity of PE\_PGRS11) for indicated time points. The importance of Mg<sup>++</sup> was further established by using EDTA as a chelating agent in 1:1 ratio to chelate out Mg<sup>++</sup>. **D.** Active site mutants of PE\_PGRS11 ‘s Phosphoglycerate mutase domain (R289A; H290A; S348A; R289A, H290A; R289A, H290A, G291A) exhibited significant reduction in the catalytic properties of the protein. **E.** Expression analysis of narG transcripts in the RNA isolated from *M. tuberculosis* grown under indicated growth conditions. The results are representative of three independent experiments. WT, *Wild type*

Supplementary Figure S3

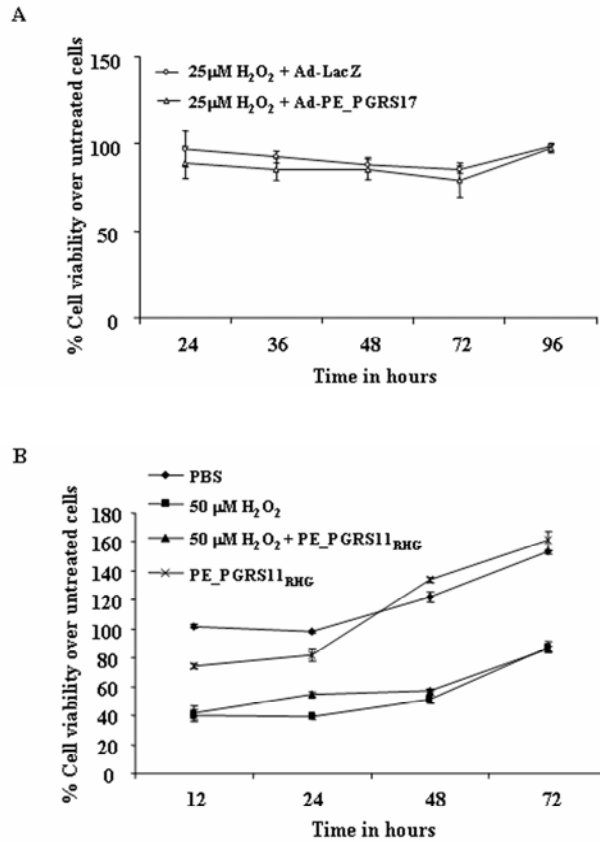

Supplementary Figure S3. Specificity and role of Phosphoglycerate mutase domain of PE\_PGRS11 in protection of alveolar epithelial A549 cells against oxidative stress. *A.* PE\_PGRS17 does not protect lung epithelial cells against oxidative stress. Cell viability of A549 cells infected with Ad-PE\_PGRS17 or Ad-LacZ upon oxidative stress (25 µM H<sub>2</sub>O<sub>2</sub>) as determined by MTT assay. *B.* Percentage cell viability for A549 cells under oxidative stress (50 µM H<sub>2</sub>O<sub>2</sub>) upon treatment with triple mutant R289A, H290A, G291A of PE\_PGRS11 (PE\_PGRS<sub>RHG</sub>). The data represent two independent experiments.

Supplementary Figure S4

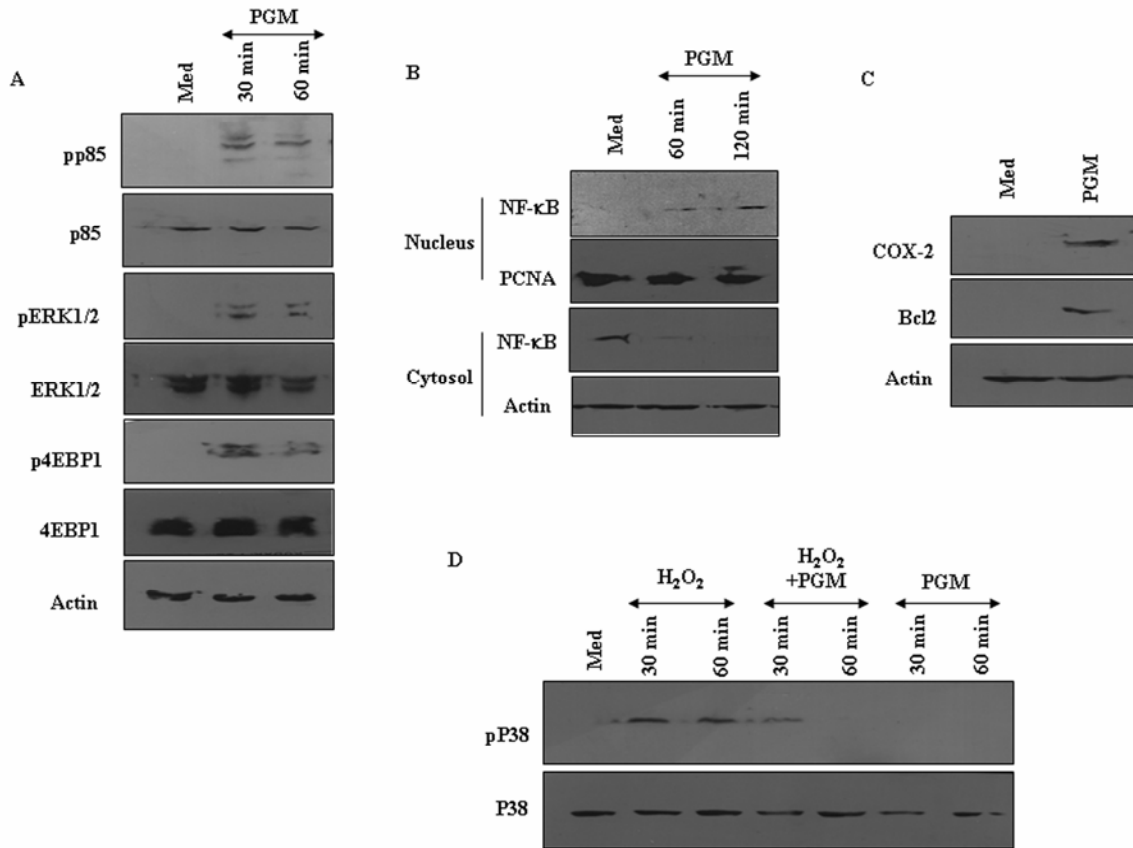

**Supplementary Figure S4.** Phosphoglycerate mutase (PGM) domain of PE\_PGRS11 regulates apoptotic and anti-apoptotic signaling axis in alveolar epithelial A549 cells. **A.** Phosphoglycerate mutase (PGM) domain triggers activation of p85 (PI3K), ERK1/2 and 4EBP1. **B.** Phosphoglycerate mutase (PGM) domain induced nuclear translocation of NF-κB. **C.** Induced expression of COX-2 and Bcl2 by Phosphoglycerate mutase (PGM) domain. **D.** Phosphoglycerate mutase (PGM) domain inhibits H<sub>2</sub>O<sub>2</sub> triggered activation of p38 MAPK. The blots are representative of two independent experiments.

Supplementary Figure S5

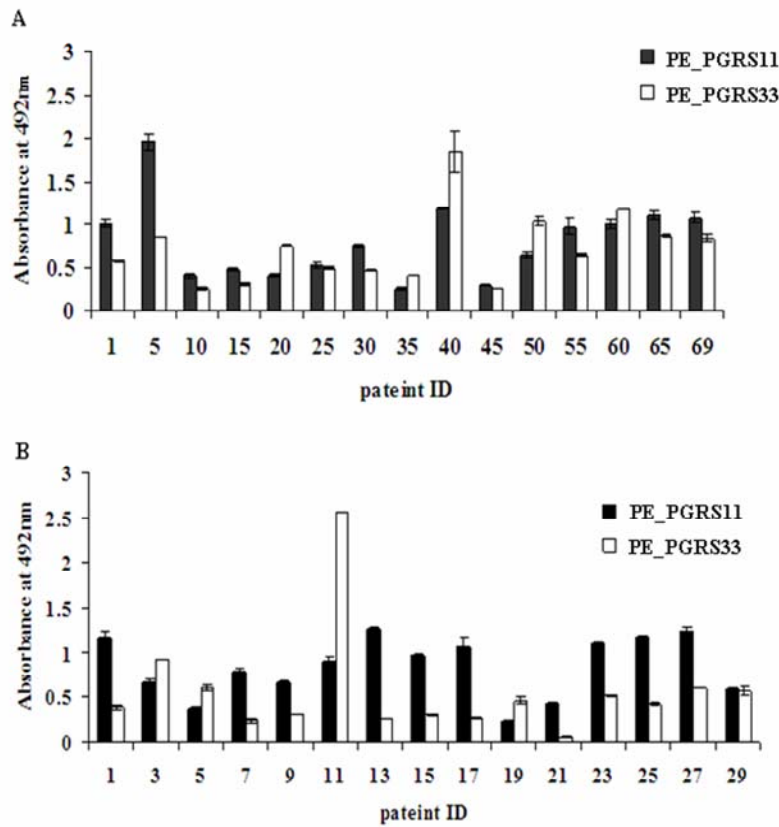

Supplementary Figure S5. Individual pulmonary tuberculosis patients demonstrate differential antibody responses to PE\_PGRS11 and PE\_PGRS33. A & B. Differential humoral antibody responses to PE\_PGRS11 and PE\_PGRS33 from sera of selected (A) adult and (B) child pulmonary tuberculosis patients (group 1).
